# Supplementary figures and images for: Hypomagnesemia Is a Risk Factor for Infections after Kidney Transplantation: A Retrospective Cohort Analysis
Source: MDPI journal article supplement (doi:10.3390/nu13041296), 2021-04-14

**Figure S1.** All-cause mortality comparing patients with a serum  $\text{Mg}^{2+}$  level  $\geq 0.7$  mmol/L and  $< 0.7$  mmol/L

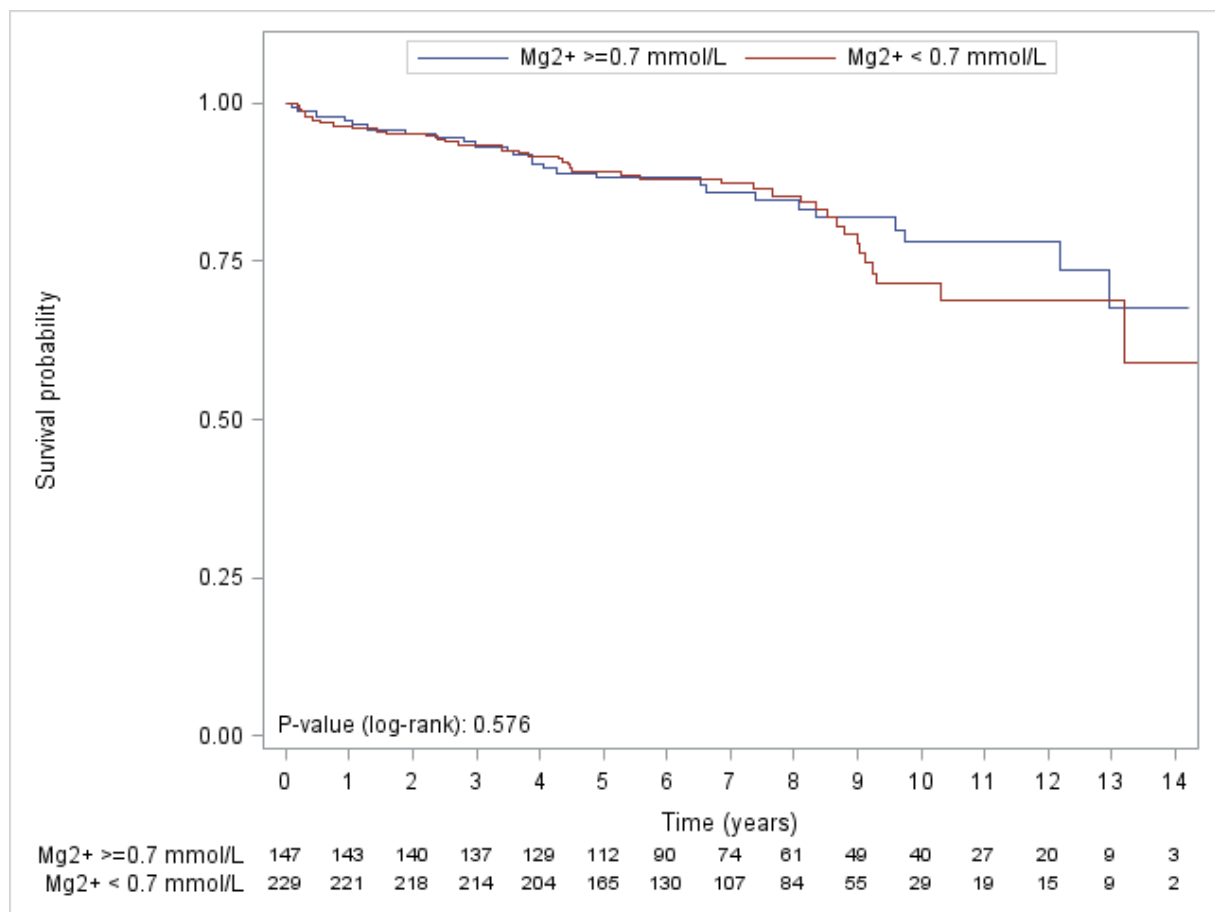

Supplement: s1 [file s1]
